# Supplementary material for: Coevolution and dependency influence resistance of mutualists to exploitation
Source: Frontiers journal article supplement (doi:10.3389/fevo.2024.1113963), 2024-03-14
Supplement: Table_1.docx [file Table_1.docx]

Supplementary Material

Coevolution and dependency influence resistance of mutualists to exploitation

Mayra C. Vidal*, Renuka Agarwal, Kari A. Segraves

*** Correspondence:**Mayra C. Vidal
mayra.cadorinvidal@umb.edu

Supplementary Table 1: Genotypes of yeast strains used in the experiment

|  | Ade mutualist | Lys mutualist | Lys exploiter | Ade exploiter |
| --- | --- | --- | --- | --- |
| Combo 1 | RY1069:  MATa ste3Δ::kanMX4 lys2Δ0 leu2Δ0 ura3Δ0 ade4OP | RY1051:  MATa ste3Δ::kanMX4 ade8Δ0 his3Δ1 ura3Δ0 LYS21OP | RY1060:  MATa ste3Δ::kanMX4 lys2Δ0 his3Δ1 leu2Δ0 ADE4WT | RY1042:  MATa ste3Δ::kanMX4 ade8Δ0 his3Δ1 leu2Δ0 LYS21WT |
| Combo 2 | RY1063:  MATa ste3Δ::kanMX4 lys2Δ0 his3Δ1 ura3Δ0 ade4OP | RY1039:  MATa ste3Δ::kanMX4 ade8Δ0 his3Δ1 leu2Δ0 lys21OP | RY1072:  MATa ste3Δ::kanMX4 lys2Δ0 leu2Δ0 ura3Δ0 ADE4WT | RY1048:  MATa ste3Δ::kanMX4 ade8Δ0 leu2Δ0 ura3Δ0 LYS21WT |
